# Supplementary material for: S-doped porous carbon confined SnS nanospheres with enhanced electrochemical performance for sodium-ion batteries
Source: Royal Society of Chemistry journal article supplement (doi:10.1039/c8ta06106h), 2018-01-01
Supplement: c8ta06106h1.pdf [file c8ta06106h1.pdf]

Electronic Supplementary information

**S-doped porous carbon nanospheres confined SnS with enhanced electrochemical performance for sodium-ion batteries**

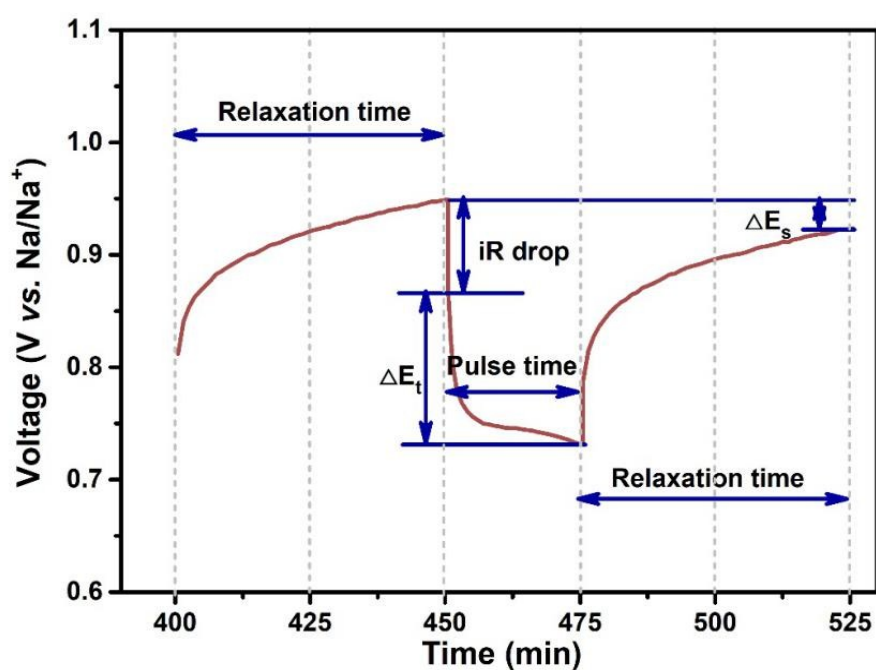

**Fig. S1.** E vs. t profile for a single GITT during discharge process.

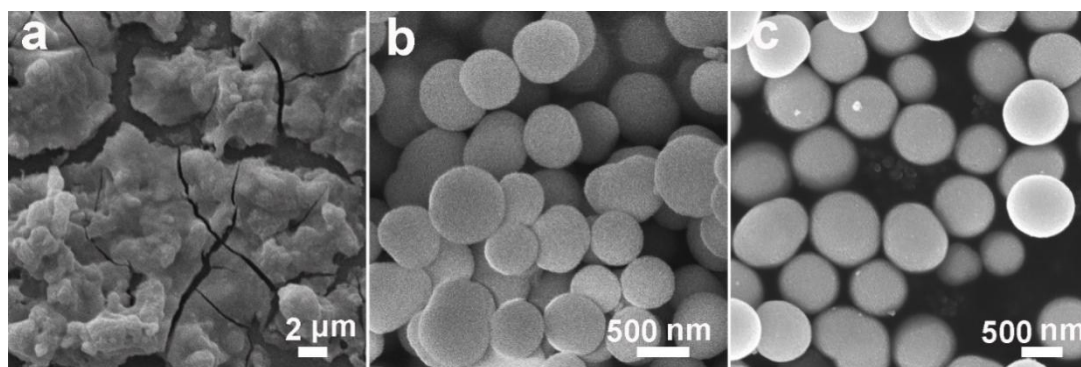

**Fig. S2.** The SEM images of Sn-Precursor obtained by using different raw materials. (a) 0.2 g  $\text{SnCl}_2 \cdot \text{H}_2\text{O}$ ; (b) 0.2 g ascorbic acid/0.1 g  $\text{SnCl}_2 \cdot \text{H}_2\text{O}$ ; (c) 0.4 g ascorbic acid/0.2 g  $\text{SnCl}_2 \cdot \text{H}_2\text{O}$ .

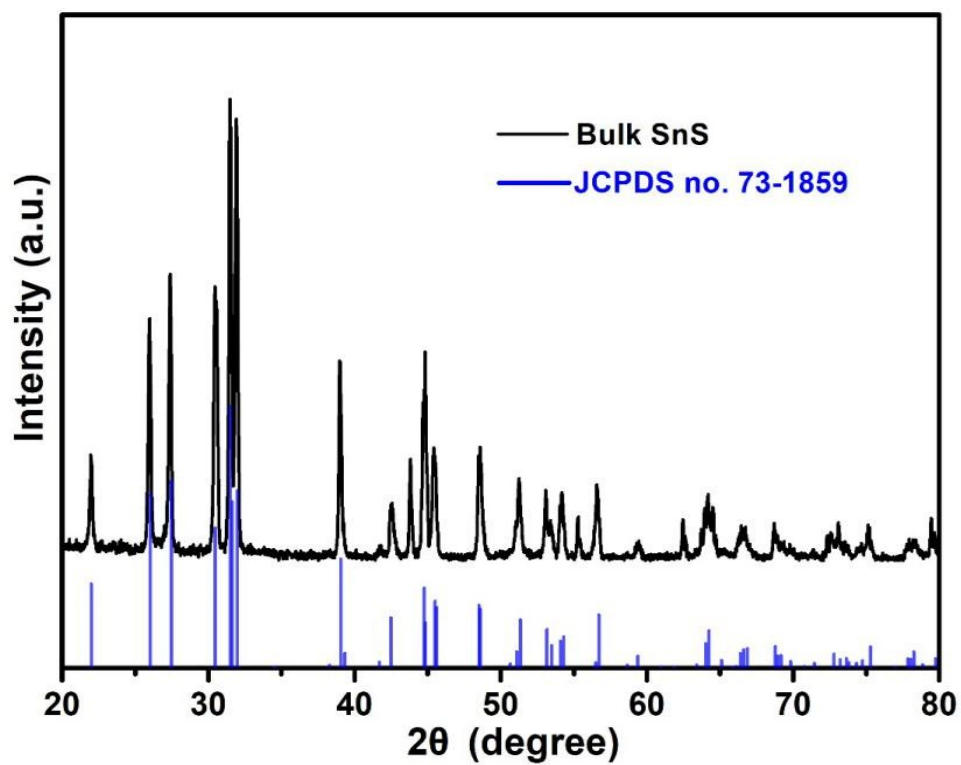

**Fig. S3.** XRD patterns of the bulk SnS obtained by annealing Sn with S powder in Ar atmosphere at 400 °C.

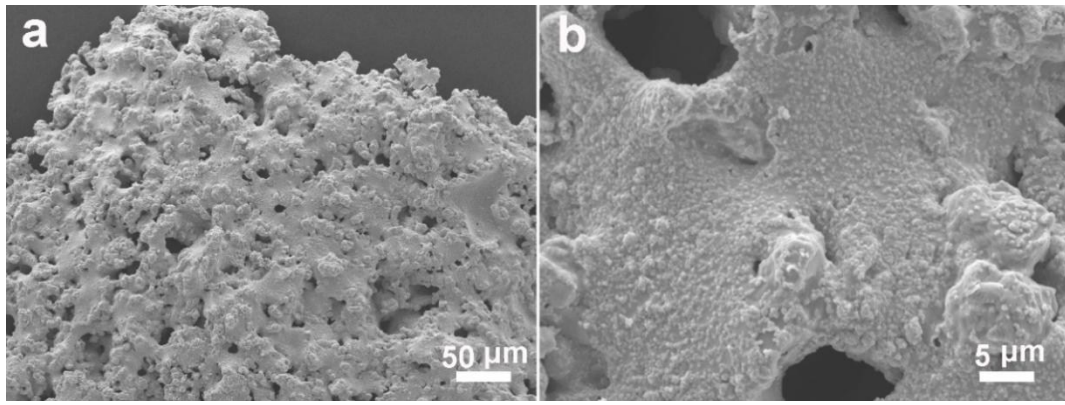

**Fig. S4.** The SEM images (a, b) of bulk SnS.

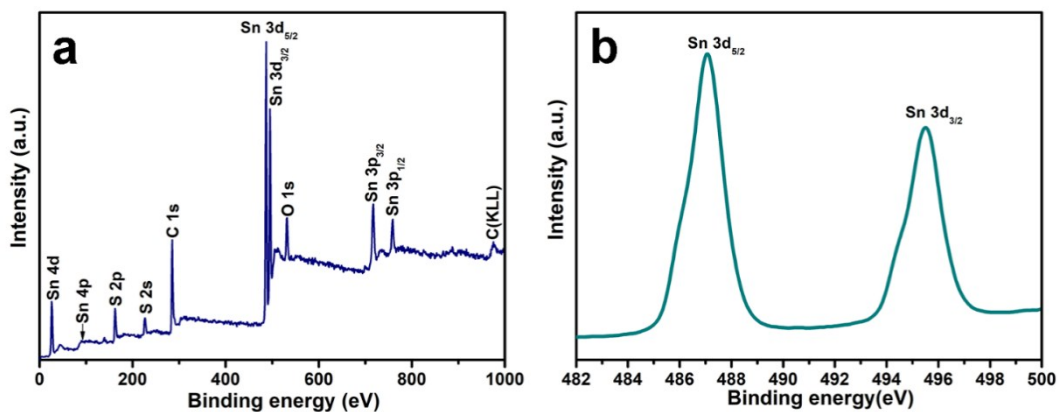

**Fig. S5.** Typical XPS survey spectra (a) and the corresponding Sn 3d (b) XPS spectra of the SnS@SPC composite.

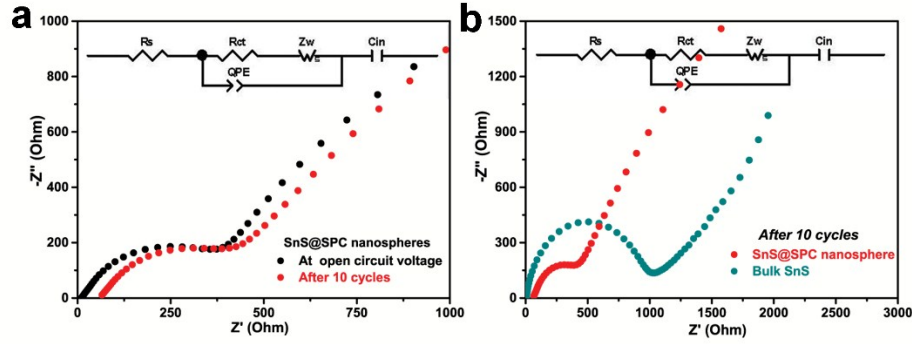

**Fig. S6.** Electrochemical impedance spectra of the SnS@SPC electrode at open circuit voltage and after 10 cycles (a) and the bulk SnS electrode (b) after 10 cycles. Inset is the equivalent circuit model for the impedance spectra.  $R_s$  is the combination of electrolyte resistance and ohmic resistance of cell components.  $R_f$  is the resistance of solid electrolyte interface (SEI) films. For the fresh electrodes, no SEI films were formed.  $R_{ct}$  is represented for the charge transfer resistance of electrochemical reactions.  $C_f$ ,  $QPE$ ,  $Z_w$  and  $C_{in}$  are the surface-passivating layer capacitance, double layer capacitance, Warburg impedance, and the reflection of intercalation capacitance, respectively.

**Table S1** Fitting parameters of components for Nyquist plots of SnS@SPC at open circuit voltage or after 10<sup>th</sup> cycle.

| Samples                | $R_s$ ( $\Omega$ ) | $R_f$ ( $\Omega$ ) | $R_{ct}$ ( $\Omega$ ) | $R_{cell}$ ( $\Omega$ )( $R_{cell}=R_s+R_f+R_{ct}$ ) |
|------------------------|--------------------|--------------------|-----------------------|------------------------------------------------------|
| Open circuit voltage   | 10.68              |                    | 334.2                 | 344.88                                               |
| 10 <sup>th</sup> cycle | 10.83              | 18.16              | 363.4                 | 392.39                                               |

**Table S2** Fitting parameters of components in analog circuit for Nyquist plots of Fig. S6b.

| Samples  | $R_s$ ( $\Omega$ ) | $R_f$ ( $\Omega$ ) | $R_{ct}$ ( $\Omega$ ) | $R_{cell}$ ( $\Omega$ )( $R_{cell}=R_s+R_f+R_{ct}$ ) |
|----------|--------------------|--------------------|-----------------------|------------------------------------------------------|
| SnS@SPC  | 10.83              | 18.16              | 363.4                 | 392.39                                               |
| Bulk SnS | 3.21               | 27.65              | 873.6                 | 904.46                                               |
